# Supplementary material for: Structural Characteristics of PON1 with Leu55Met and Gln192Arg Variants Influencing Oxidative-Stress-Related Diseases: An Integrated Molecular Modeling and Dynamics Study
Source: MDPI journal article supplement (doi:10.3390/medicina59122060), 2023-11-22

## PON1 multiple Sequences

### PON1 Wild

MAKLIALTLLGMGLALFRNHQSSYQTRLNALREVQPVELPNCNLVKGIETGSEDLEILPNGLAFISSGLK  
YPGIKSFNPNSPGKILLMDLNEEDPTVLELGITGSKFDVSSFNPHGISTFTDEDNAMYLLVVNHPDAKST  
VELFKFQEEEEKSLLHLKTIRHKLLPNLNDIVAVGPEHFYGTNDHYFLDPYLQSWEMYLGLAWSYVVVYS  
PSEVRVVAEGFDFANGINISPDGKYVYIAELLAHKIHVYEKCHANWTLTPLKSLDFNTLVDNISVDPETG  
DLWVGCHPNGMKIFFYDSENPPASEVLRIQNILTEEPKVTQVYAENGTVLQGSTVASVYKGKLLIGTVF  
HKALYCEL

### L55M

MAKLIALTLLGMGLALFRNHQSSYQTRLNALREVQPVELPNCNLVKGIETGSEDMEILPNGLAFISSGL  
KYPGIKSFNPNSPGKILLMDLNEEDPTVLELGITGSKFDVSSFNPHGISTFTDEDNAMYLLVVNHPDAKS  
TVELFKFQEEEEKSLLHLKTIRHKLLPNLNDIVAVGPEHFYGTNDHYFLDPYLQSWEMYLGLAWSYVVY  
YSPSEVRVVAEGFDFANGINISPDGKYVYIAELLAHKIHVYEKCHANWTLTPLKSLDFNTLVDNISVDPET  
GDLWVGCHPNGMKIFFYDSENPPASEVLRIQNILTEEPKVTQVYAENGTVLQGSTVASVYKGKLLIGTV  
FHKALYCEL

### Q192R

MAKLIALTLLGMGLALFRNHQSSYQTRLNALREVQPVELPNCNLVKGIETGSEDLEILPNGLAFISSGLK  
YPGIKSFNPNSPGKILLMDLNEEDPTVLELGITGSKFDVSSFNPHGISTFTDEDNAMYLLVVNHPDAKST  
VELFKFQEEEEKSLLHLKTIRHKLLPNLNDIVAVGPEHFYGTNDHYFLDPYLRSWEMYLGLAWSYVVVYS  
PSEVRVVAEGFDFANGINISPDGKYVYIAELLAHKIHVYEKCHANWTLTPLKSLDFNTLVDNISVDPETG  
DLWVGCHPNGMKIFFYDSENPPASEVLRIQNILTEEPKVTQVYAENGTVLQGSTVASVYKGKLLIGTVF  
HKALYCEL

**Figures S1.** Contact frequency analysis. A) Leu55Met, B) Gln192Arg, and C) wild-type.

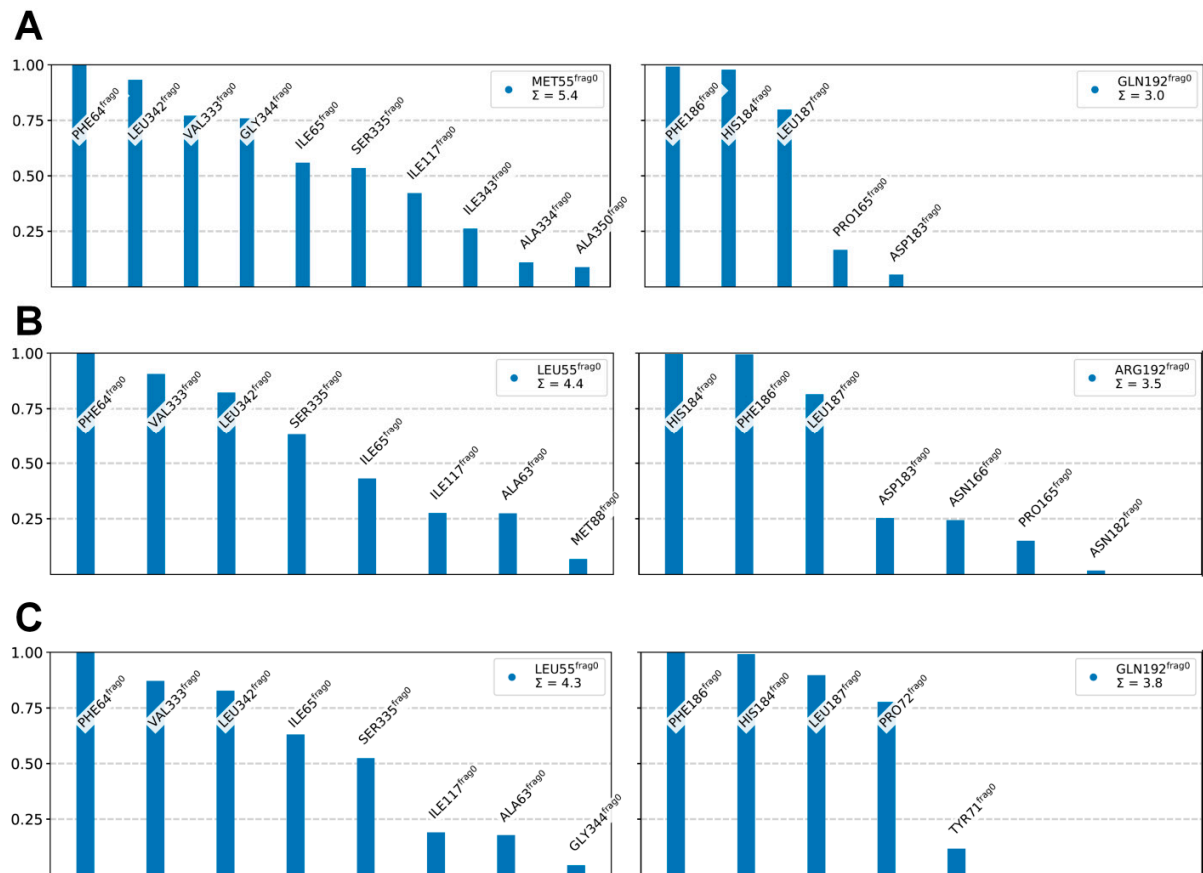

**Figures S2.** Contact frequency analysis for Leu55Met PON1 for Met55 mutation. The top panel plot shows the comparison in contact frequency between three variants of PON1, while the other panels show the distance independent contact frequency distribution comparison for Met55 mutation.

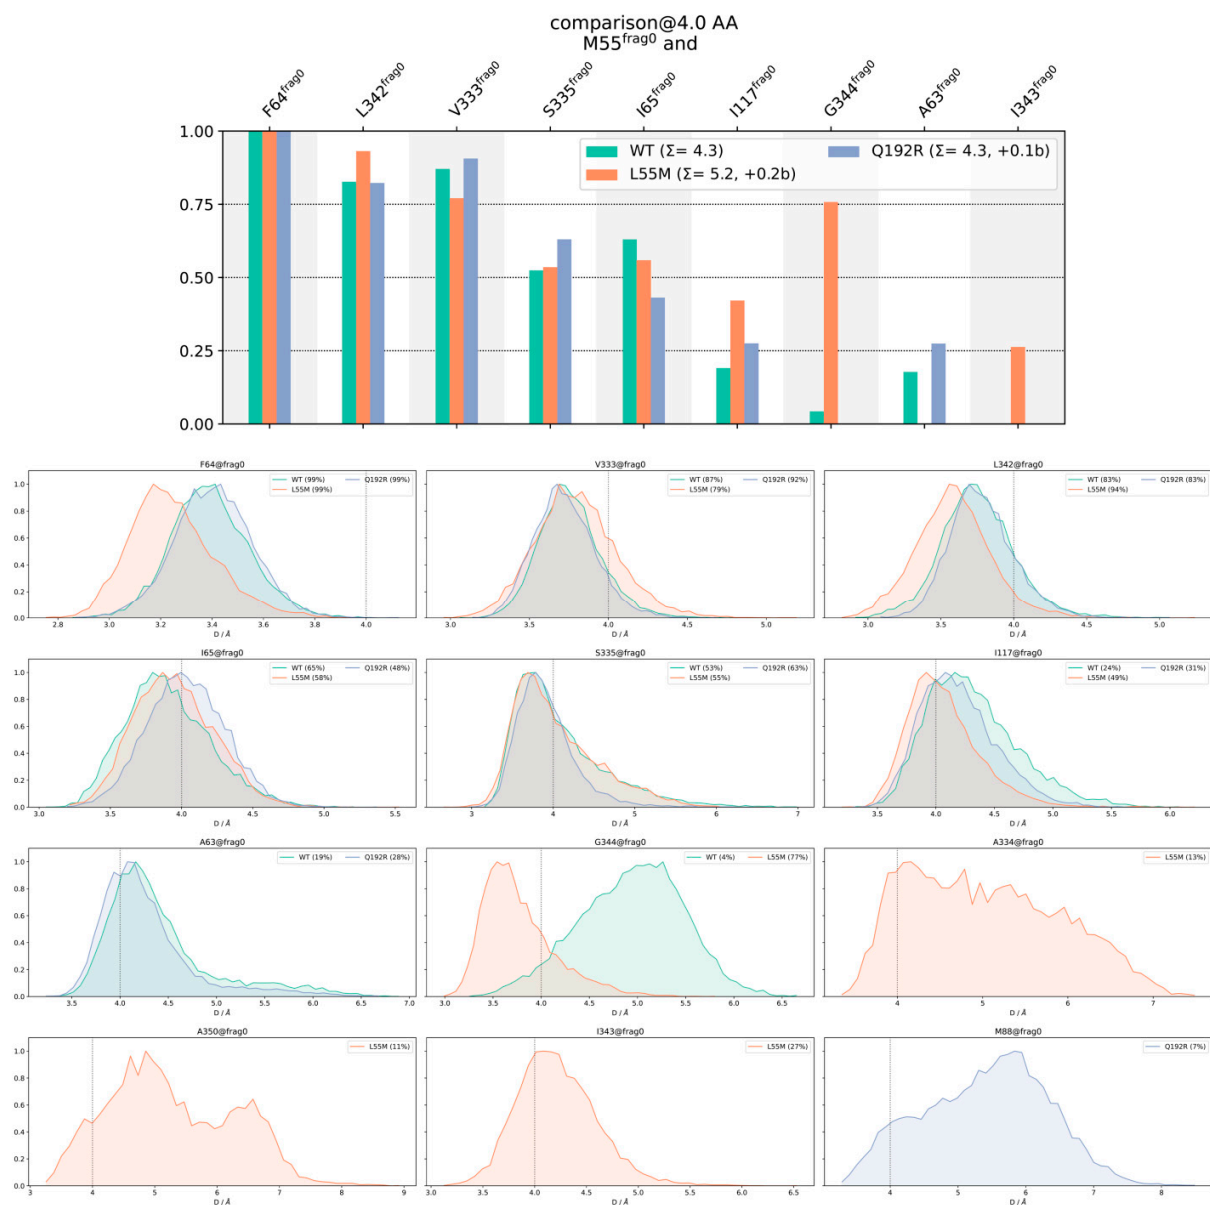

**Figures S3.** Contact frequency analysis for Gln192Arg PON1. The top panel plot shows the comparison in contact frequency between three variants of PON1 for Arg192 mutation, while the other panels show the distance independent contact frequency distribution comparison for Arg192 mutation.

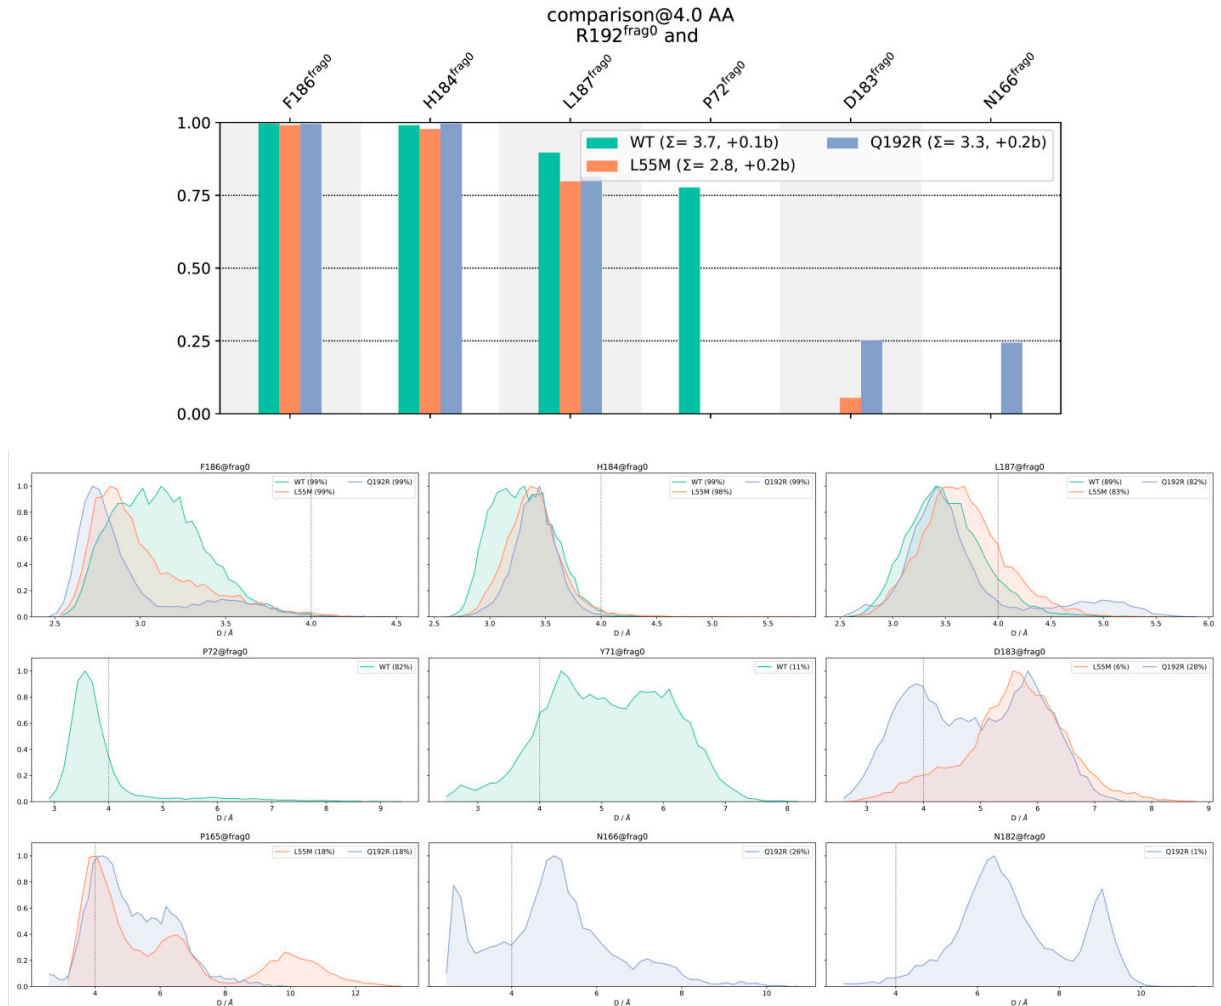

**Figures S4.** DCCM analysis. A) Leu55Met, B) Gln192Arg, and C) wild-type PON1

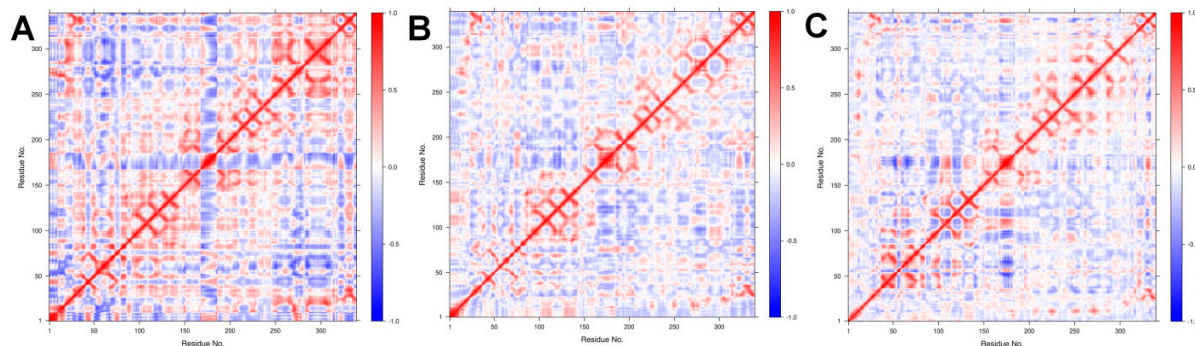

**Figures S5.** The PON1 wild-type docking with endogenous lactones: A) Dihydrocoumarin, B) 2-Hydroxy-gamma-butyrolactone C) Alpha-Angelica lactone, and D) Gamma-nonalactone. Leu55Met interacts with E) Dihydrocoumarin, F) 2-Hydroxy-gamma-butyrolactone G) Alpha-Angelica lactone, and H) Gamma-nonalactone. Gln192Arg interacts with I) Dihydrocoumarin, J) 2-Hydroxy-gamma-butyrolactone K) Alpha-Angelica lactone, and L) Gamma-nonalactone.

A)

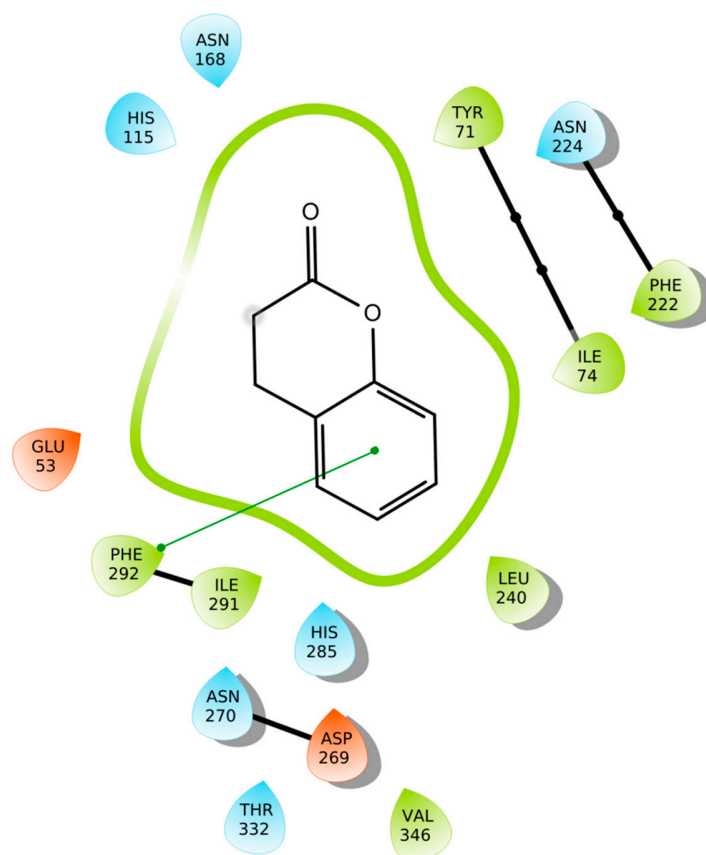

B)

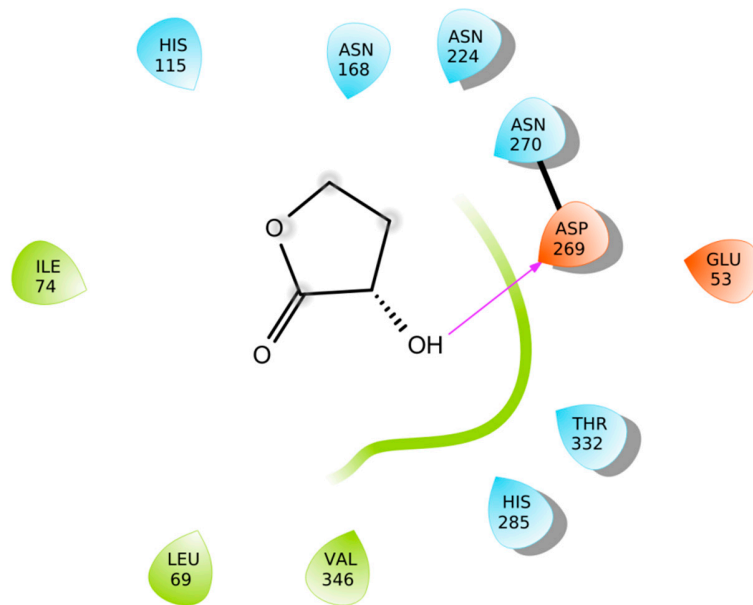

C)

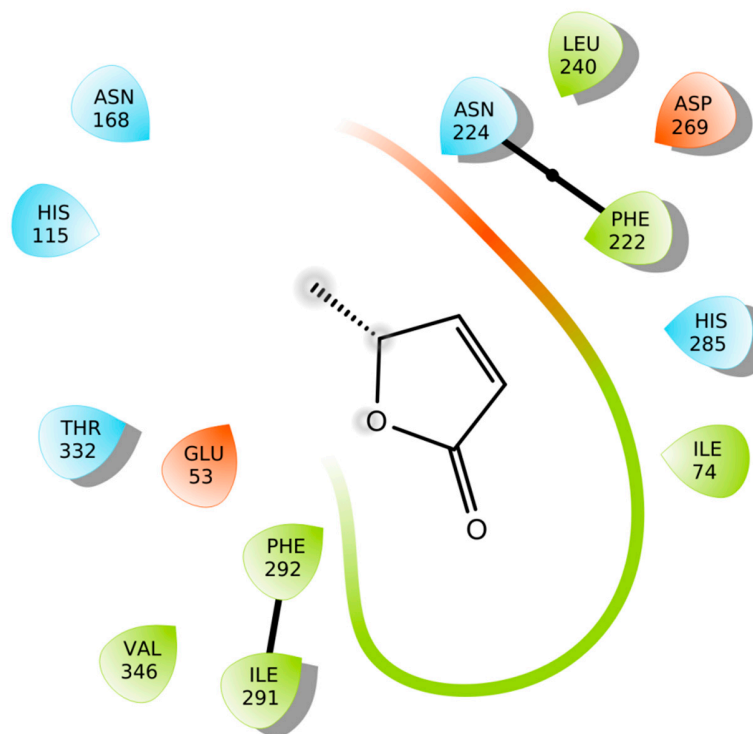

D)

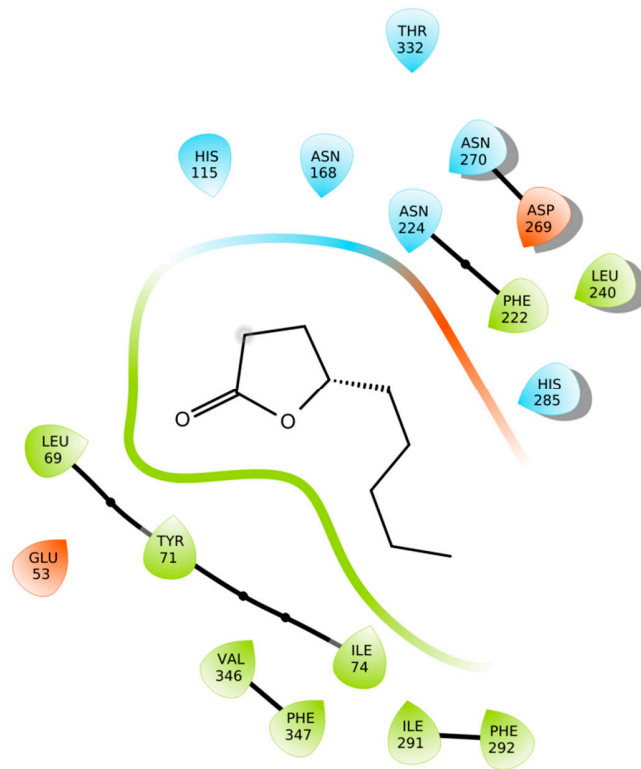

E)

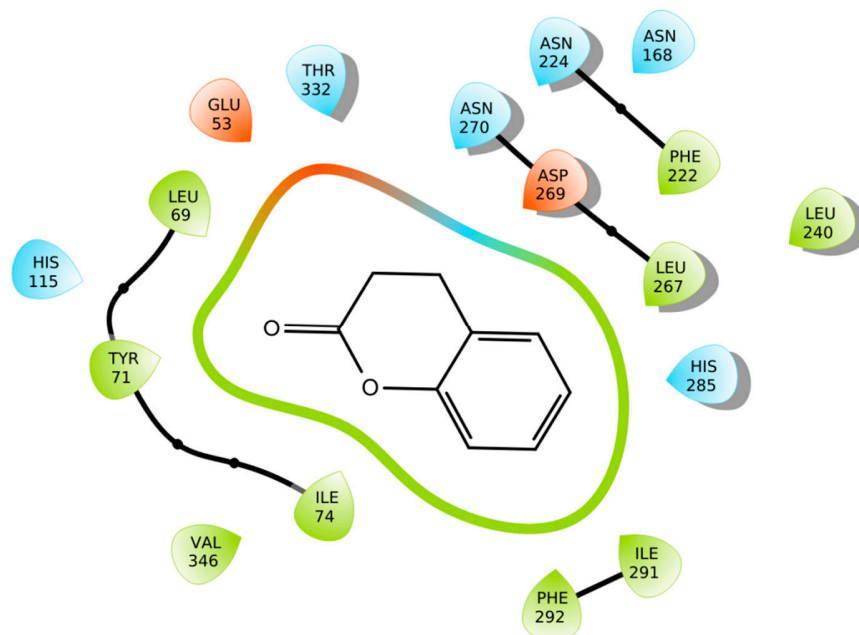

F)

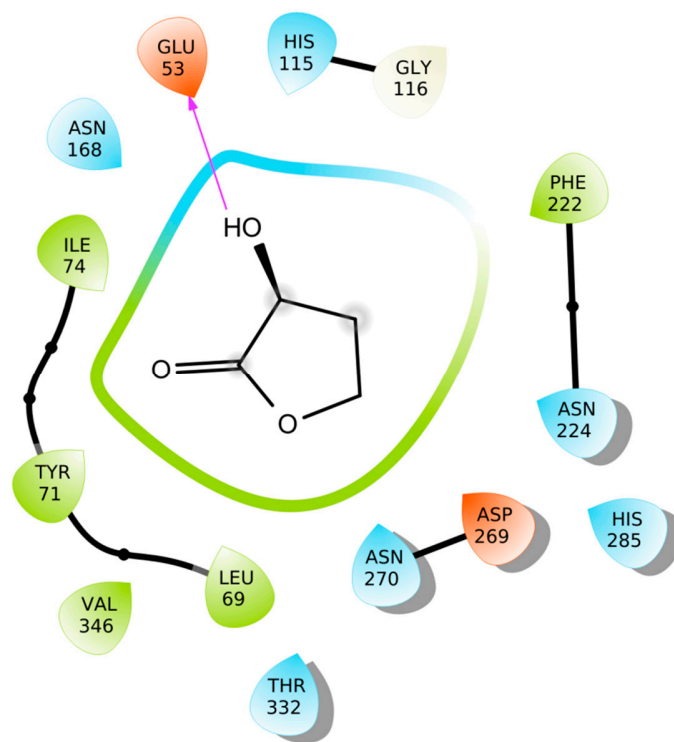

G)

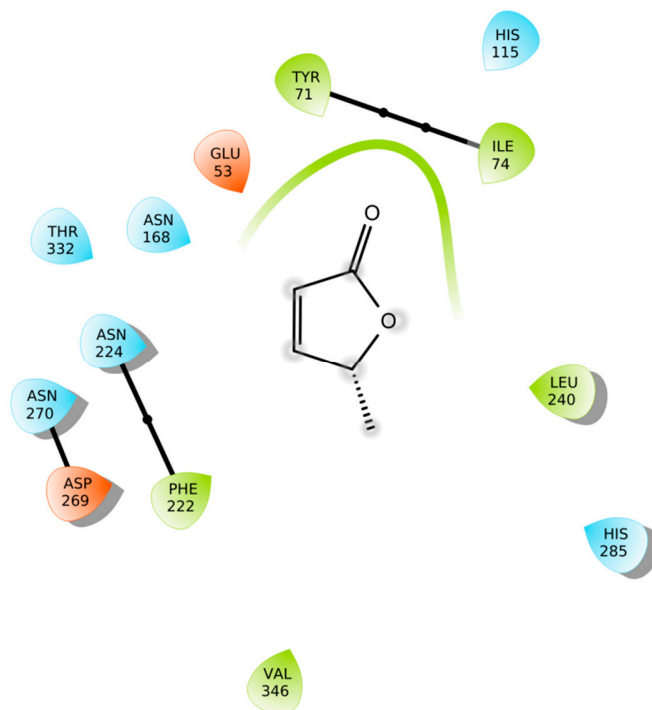



H)

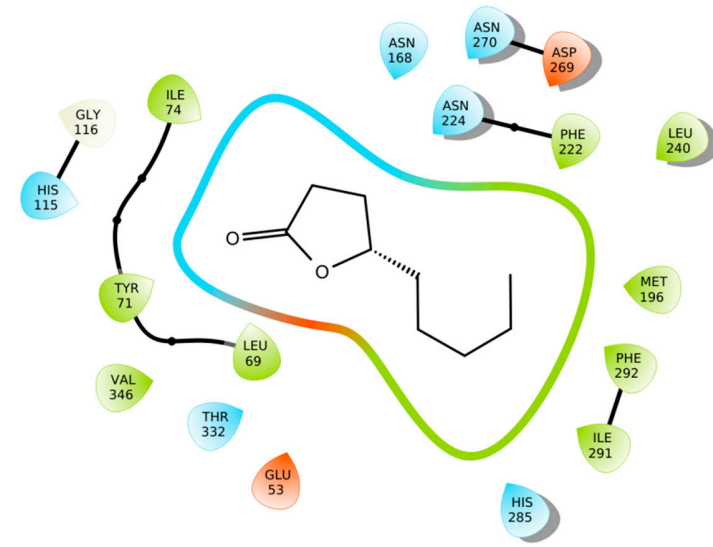

I)

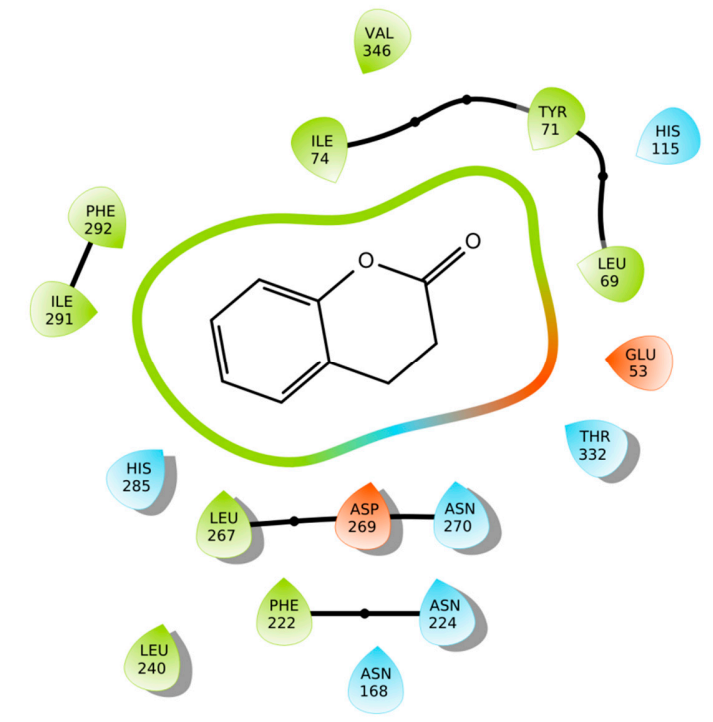

J)

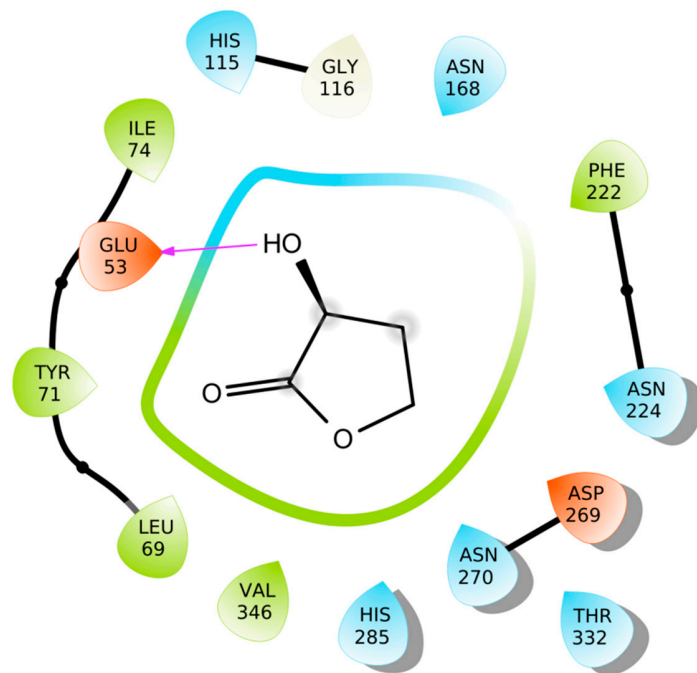

K)

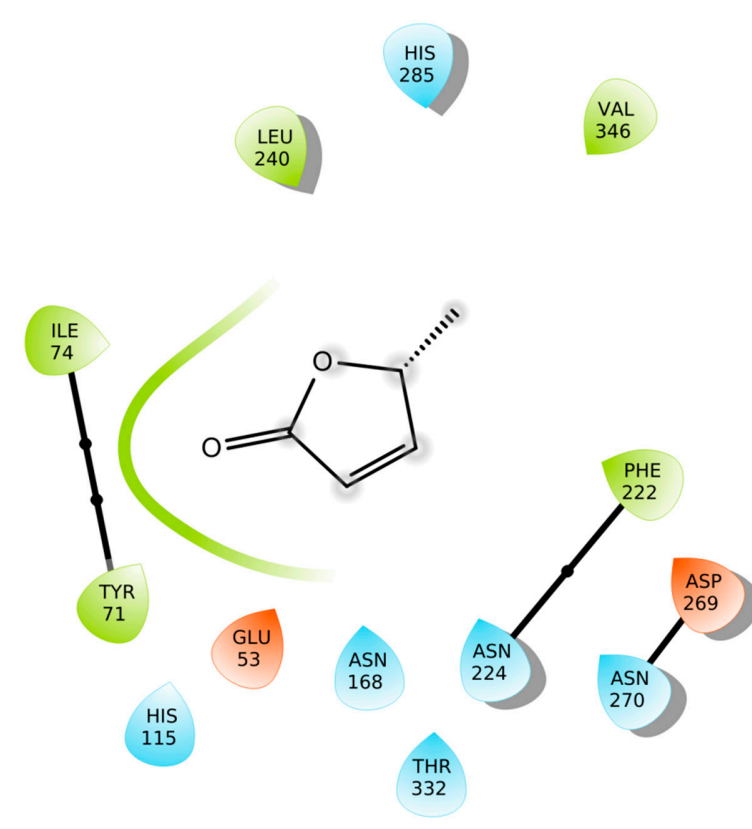

L)

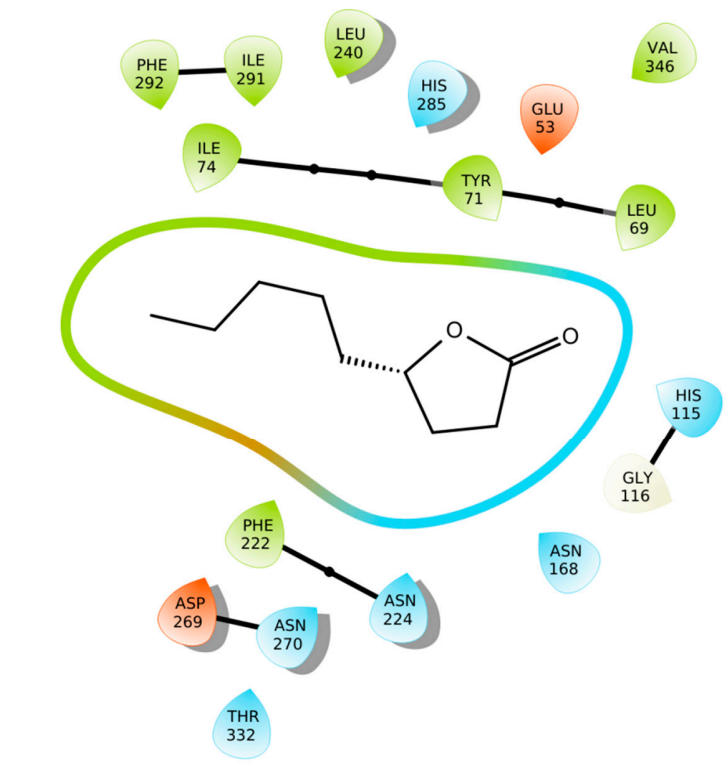

**Figures S6.** The interaction of PON1 wild-type with synthetic molecules: A) (2S,3R)-3-amino-2-hydroxyheptonicacid, B) arachidonic acid, C) 4-hydroxy docosaheanoic acid, D) dihydropyran, E) mevalonic acid, and F) 2-Hydroxyvaleric acid. Leu55Met docked with G) (2S,3R)-3-amino-2-hydroxyheptonicacid, H) arachidonic acid, I) 4-hydroxy docosaheanoic acid, J) dihydropyran, K) mevalonic acid, and L) 2-Hydroxyvaleric acid. Gln192Arg docked with M) (2S,3R)-3-amino-2-hydroxyheptonicacid, N) arachidonic acid, O) 4-hydroxy docosaheanoic acid, P) dihydropyran, Q) mevalonic acid, and R) 2-Hydroxyvaleric acid.

A)

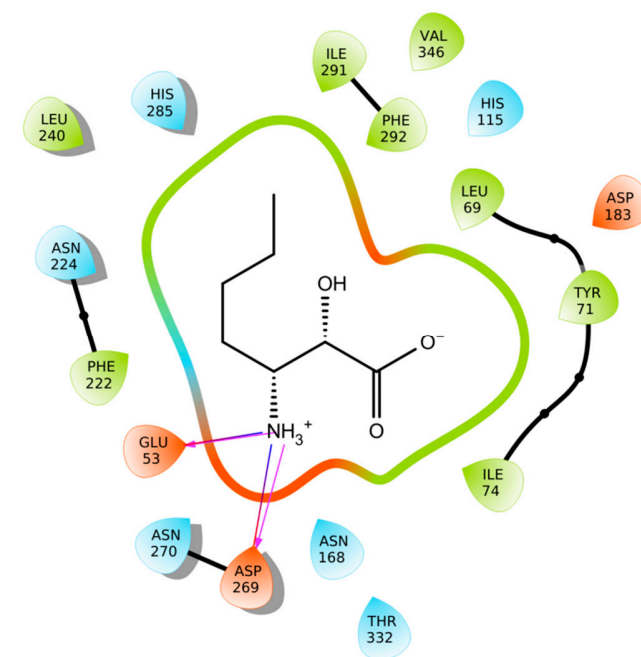

B)

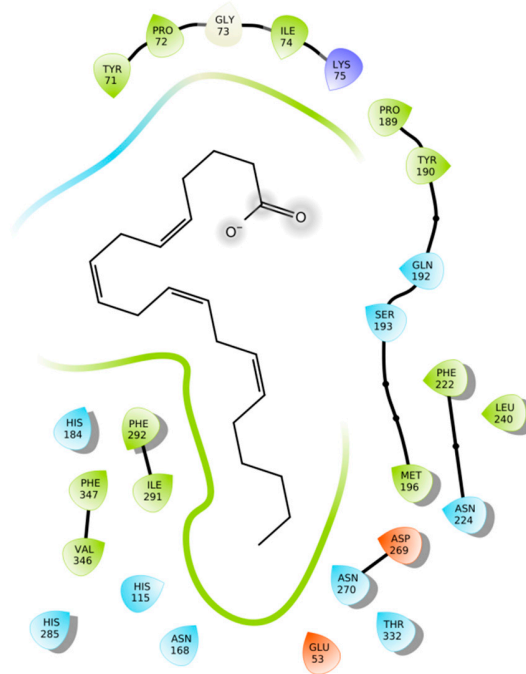

C)

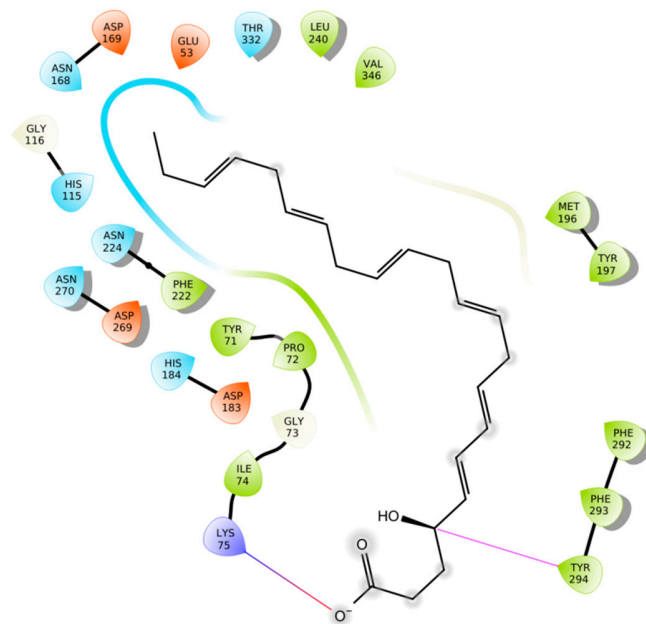

D)

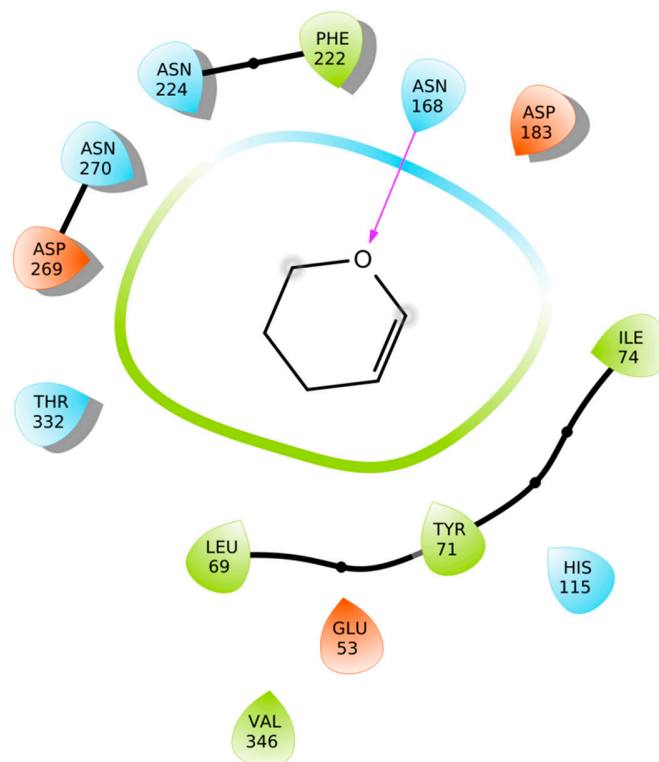

E)

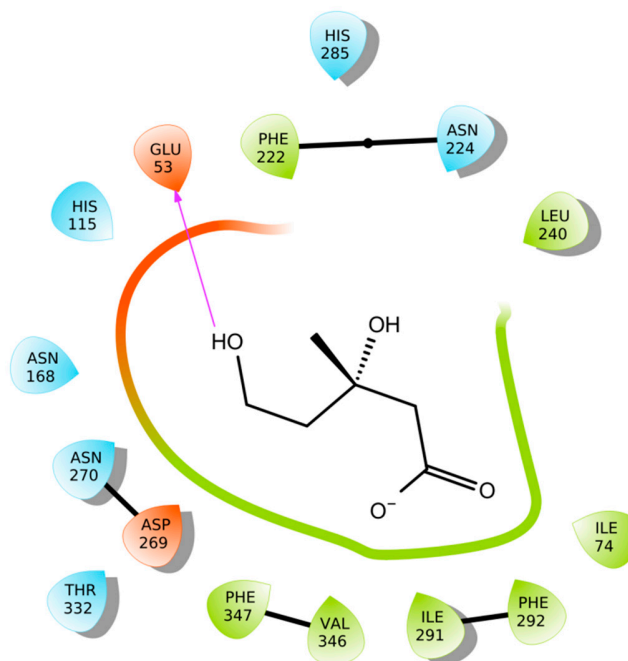

F)

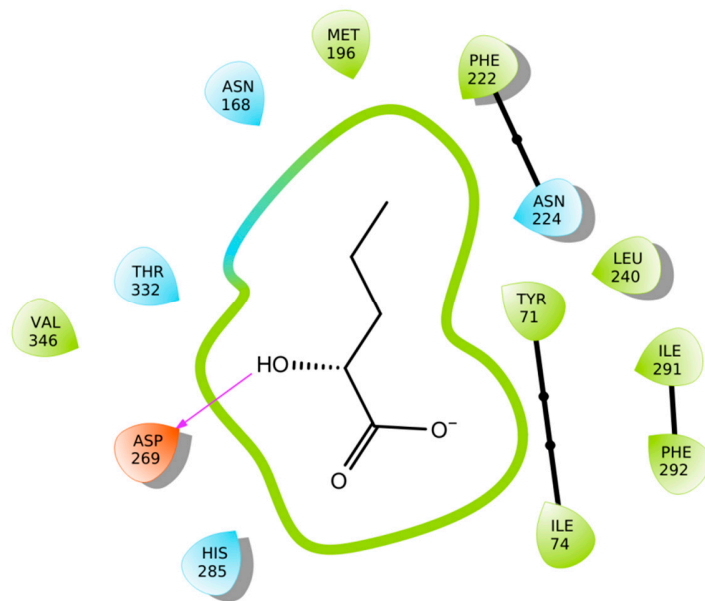

G)

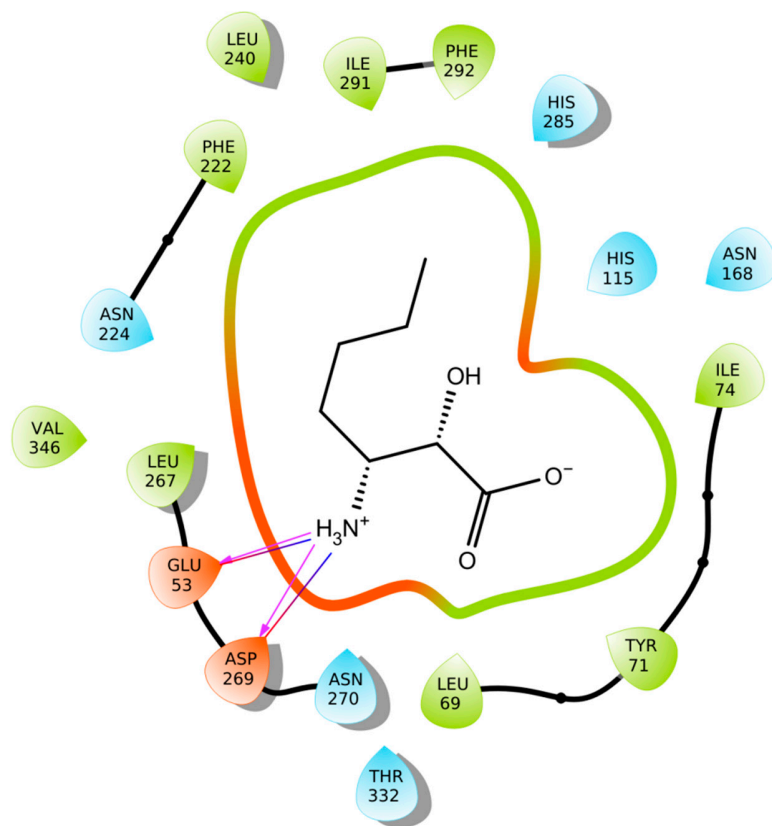

H)

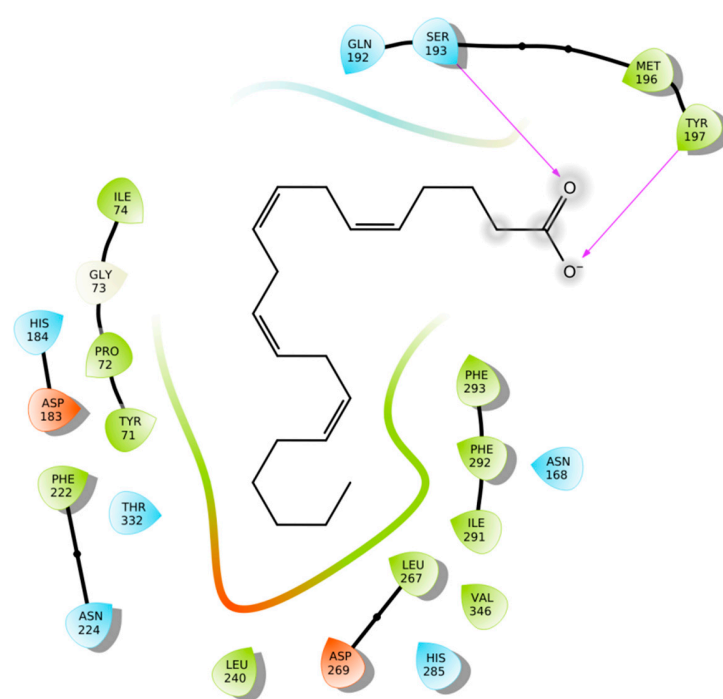

I)

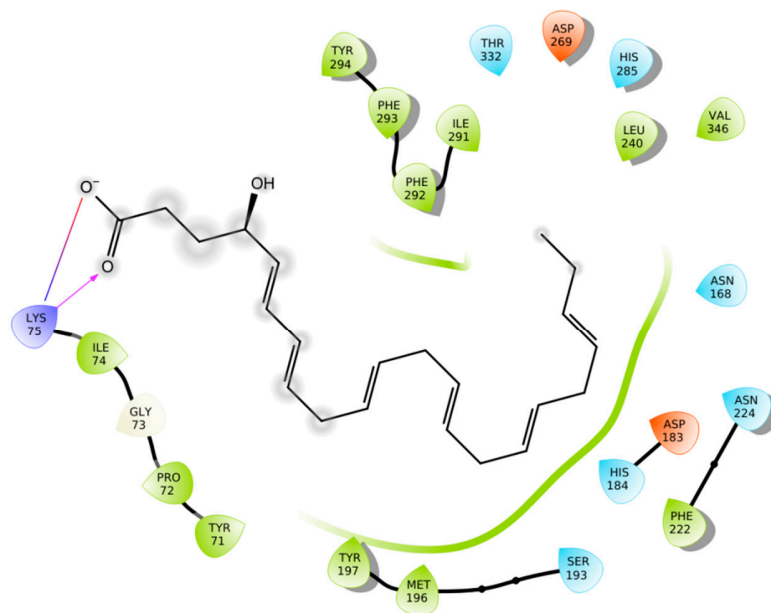



J)

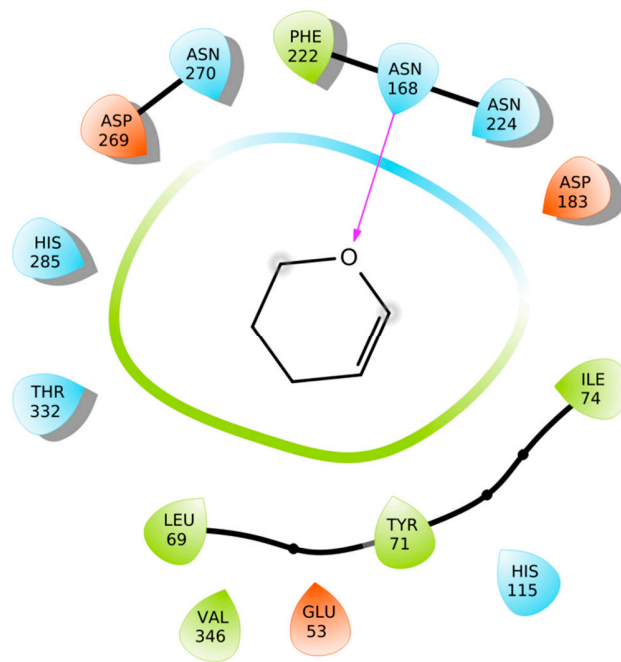

K)

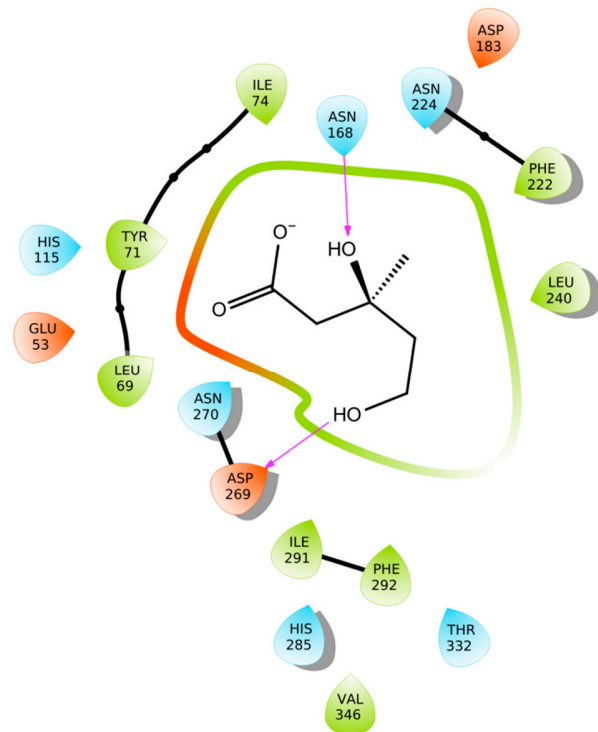

L)

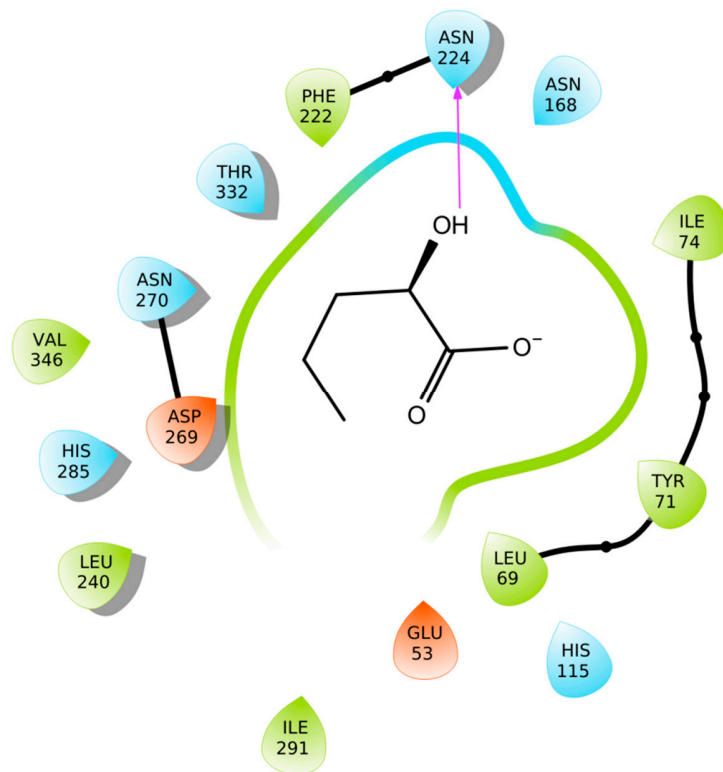

M)

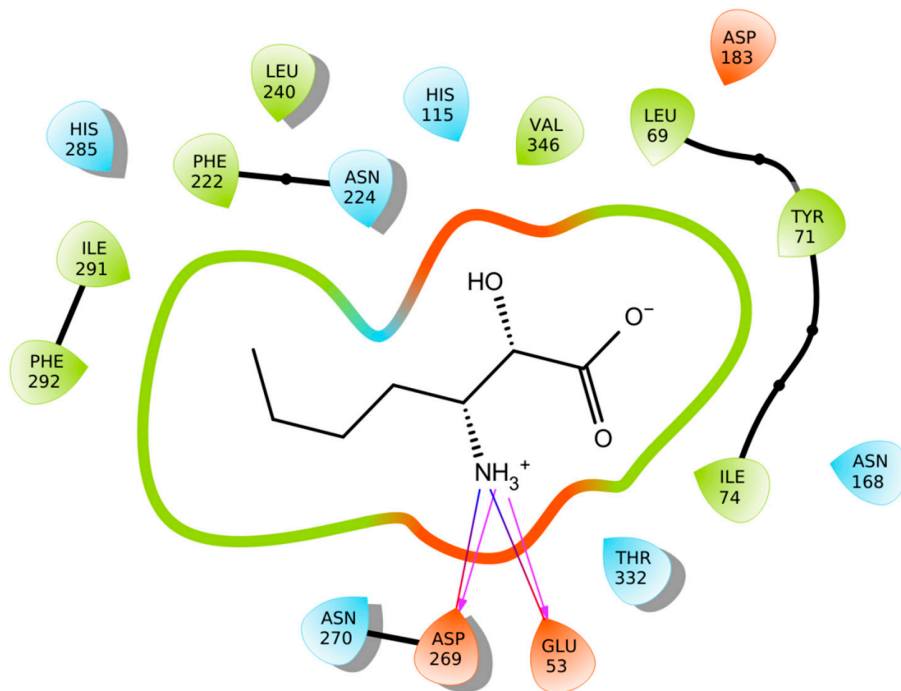

N)

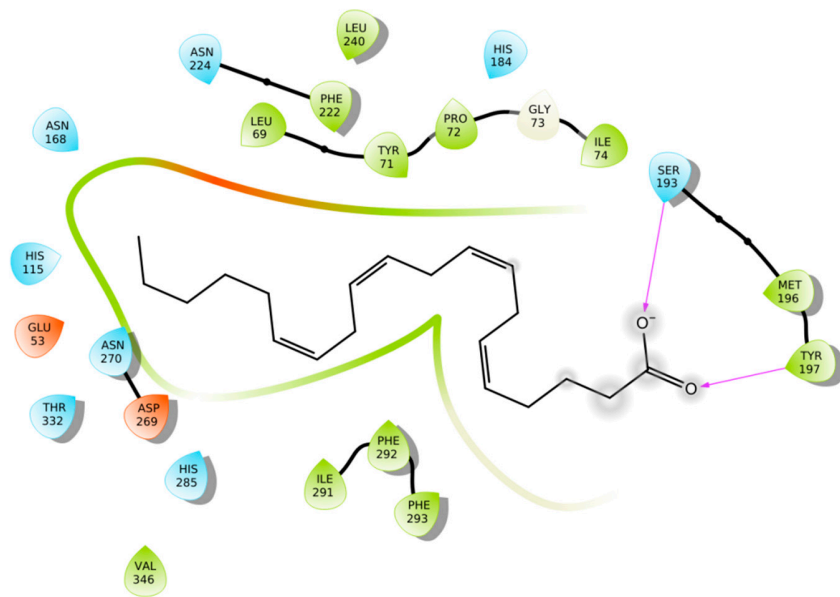

O)

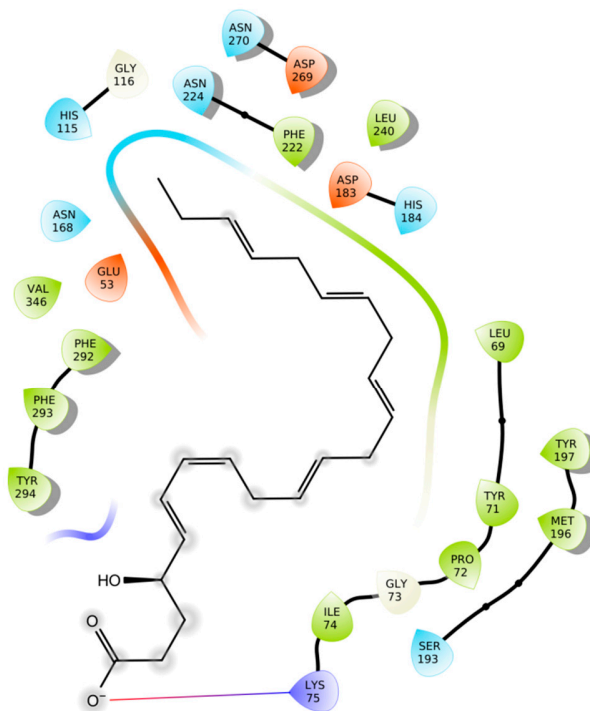

P)

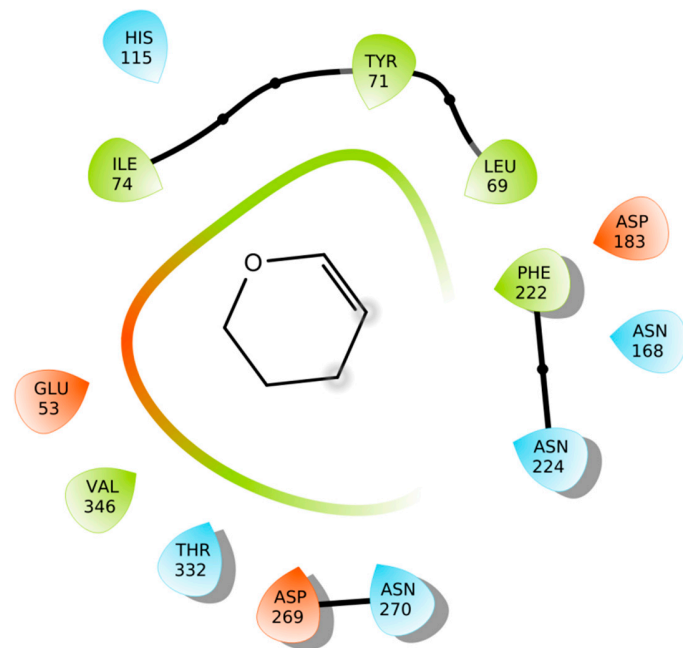

Q)

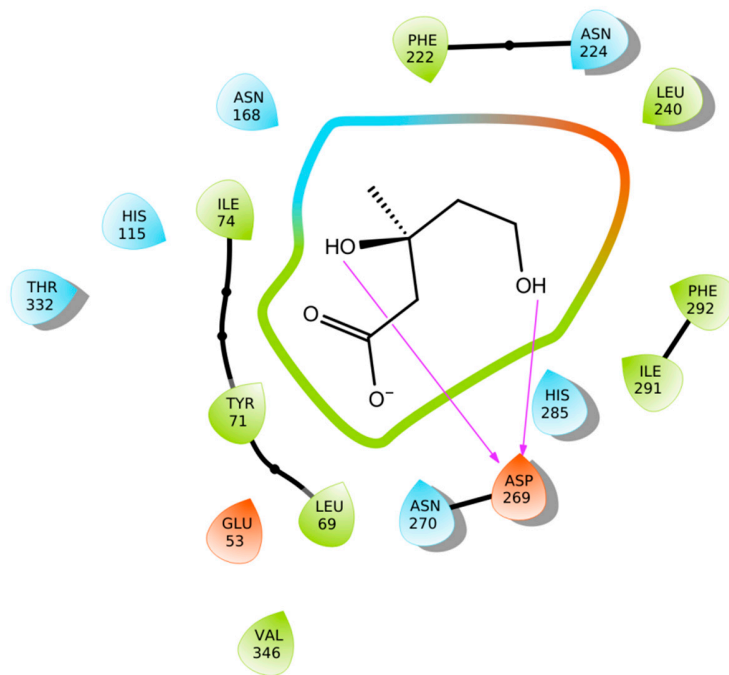

R)

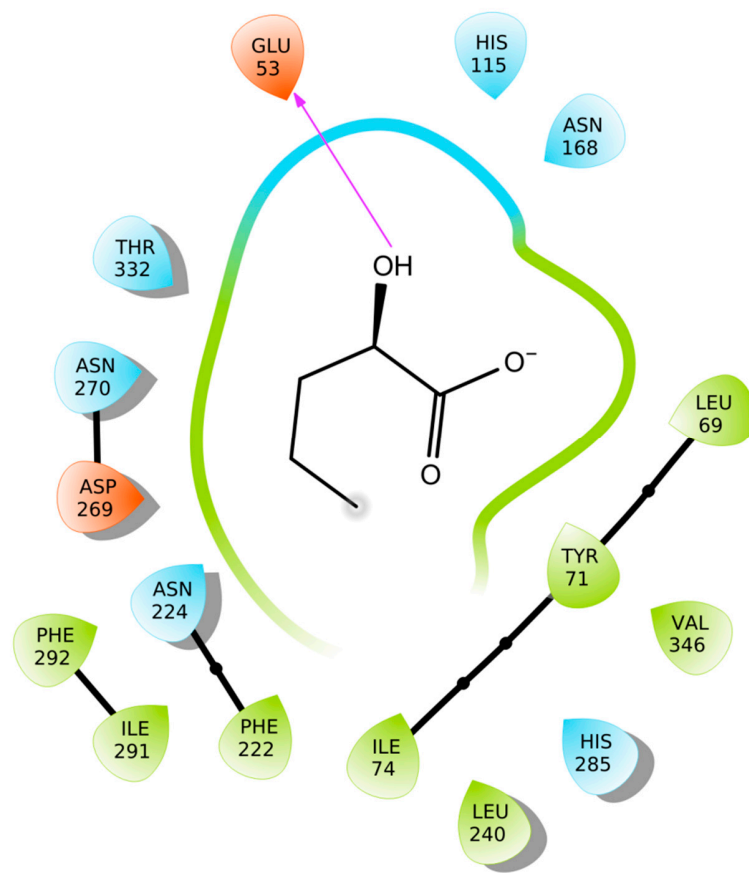

Supplement: s1 [file s1]
